# Supplementary material
Source: PubMed Central journal article supplement (PMC9989059)
Supplement: 12663_2021_1679_MOESM1_ESM.pdf [file 12663_2021_1679_MOESM1_ESM.pdf]

## ORAL EXAMINATION PROFORMA

1. Patient Name:
2. Patient ID:
3. Age/Sex:
4. Date of Admission:
5. Tested Positive On (Date):
6. Previous/ Ongoing Medication:
7. Habits:
8. Symptoms:

|     |      |           |
|-----|------|-----------|
| ILI | SARI | ANY OTHER |
|-----|------|-----------|

9. Alteration in taste:      YES / NO
10. Xerostomia:                YES / NO
11. Examination of Oral Mucosa

| Labial Mucosa |         |          |        |      |         |                    |
|---------------|---------|----------|--------|------|---------|--------------------|
| Macules       |         | Erythema | Ulcers |      |         | Any other findings |
| Size          | Borders |          | Number | Size | Margins |                    |
|               |         |          |        |      |         |                    |

| Buccal Mucosa |         |          |        |      |         |                    |
|---------------|---------|----------|--------|------|---------|--------------------|
| Macules       |         | Erythema | Ulcers |      |         | Any other findings |
| Size          | Borders |          | Number | Size | Margins |                    |
|               |         |          |        |      |         |                    |

| Gingiva              |          |        |      |         |              |                    |
|----------------------|----------|--------|------|---------|--------------|--------------------|
| Spontaneous Bleeding | Erythema | Ulcers |      |         | Desquamation | Any other findings |
|                      |          | Number | Size | Margins |              |                    |
|                      |          |        |      |         |              |                    |

| Tongue       |        |          |               |                    |
|--------------|--------|----------|---------------|--------------------|
| Inflammation |        | Erythema | Depapillation | Any other findings |
| Present      | Absent |          |               |                    |

| Hard Palate / Soft Palate |         |          |        |      |         |                    |
|---------------------------|---------|----------|--------|------|---------|--------------------|
| Macules                   |         | Erythema | Ulcers |      |         | Any other findings |
| Size                      | Borders |          | Number | Size | Margins |                    |
|                           |         |          |        |      |         |                    |

| Floor of the Mouth |         |          |        |      |         |                    |
|--------------------|---------|----------|--------|------|---------|--------------------|
| Macules            |         | Erythema | Ulcers |      |         | Any other findings |
| Size               | Borders |          | Number | Size | Margins |                    |
|                    |         |          |        |      |         |                    |

| Salivary Ductal Opening |        |                |        |
|-------------------------|--------|----------------|--------|
| Stenson's Duct          |        | Wharton's Duct |        |
| Inflammed               | Normal | Inflammed      | Normal |

12. Sample taken (with swab):

Site:

Control:
